# Supplementary material for: Study Protocol Low Cost App-Based Intervention Dialog+ for Depression and Anxiety in Outpatient Psychiatric Settings: A Study Protocol for a Pragmatic Multisite Cluster Randomized Controlled Trial
Source: Research Square preprint supplement (doi:10.21203/rs.3.rs-8416024/v1), 2026-01-23
Supplement: Supplementary file 2 [file 9dd9036daefb6b6038361e94.docx]

## Appendices

## Informed consent materials

## Appendix A: modal informed consent form

**----------------------------------------------------------------------------------------------------------------**

**Participant Information - Main Study**

**Schizophrenia Research Foundation (India)**

R/7A, North Main Road, Anna Nagar West Extn. Chennai - 600 101, India.

Ph: 2615 3971, 2615 1073

**LOW-COST APP-BASED INTERVENTION DIALOG+ FOR ANXIETY AND DEPRESSION IN OUTPATIENT PSYCHIATRIC SETTING - PRAGMATIC MULTISITE RANDOMIZED CONTROLLED TRIAL**

**Principal Investigator: Dr. Padmavati Ramachandran, SCARF (India)**

**Co-investigators:** Dr.Lakshmi Venkatraman and Ms.Hepsipa Omega Juliet from Schizophrenia Research Foundation, (India) (SCARF), Dr.Suvarna Jyothi Kantipudi from Sri Ramachandra Institute of Higher Education and Research (SRIHER), Prof.Vikas Menon, Dr Natarajan Varadharajan and Dr Ragul Ganesh from Jawaharlal Institute of Postgraduate Medical Education and Research (JIPMER), Dr.Karthick Subramanian from Mahatma Gandhi Medical College and Research Institute (MGMCRI).

You are being invited to take part in a research study being conducted by SCARF, SRIHER, JIPMER, MGMCRI and is led by Dr.Padmavati Ramachandran from SCARF (India).

**A description of the sponsors of the research project and the organizational affiliation of the researchers:**

This study will be conducted at four sites in Chennai and Puducherry, India. The research study is funded by Indian Council of Medical Research (ICMR) and Dr. Padmavati Ramachandran is affiliated to SCARF. Dr.Suvarna Jyothi Kantipudi is affiliated to SRIHER, Prof.Vikas Menon, Dr. Natarajan Varadharajan and Dr. Ragul Ganesh are affiliated to JIPMER and Dr. Karthick Subramanian is affiliated to MGMCRI.

Before you decide to take part, it is important for you to understand why the research is being done and what it will involve. Please take time to read the following information sheet carefully. Ask us if there is anything that is not clear or if you would like more information. Take time to decide whether you wish to take part.

Thank you for reading this.

**Introduction And Purpose:**

Mental health disorders are a growing concern in India, affecting about 15% of the population. Common conditions like anxiety and depression cause significant distress and challenges for individuals and society.

This research project is interested in exploring a new treatment to help patients with anxiety and depression. This treatment is called DIALOG+ and involves using a tablet computer in regular treatment sessions between patients and their mental health professionals in outpatient clinics.

In this study, we will compare a group of patients who will receive the DIALOG+ treatment with a group of patients who will receive their usual treatment.

**The estimated duration the research participant will take to in the research project:**

The participant will be in the study for approximately 6 months.

**Procedure:**

We are inviting patients who regularly see their mental health professionals at an outpatient clinic to try this new treatment/intervention. If you are willing to take part, you will first need to agree and sign 2 copies of this consent form. One will be given to the study coordinator and one to you.

We will then ask you to complete a short questionnaire relating to your satisfaction with life. This should take about 10 minutes. Depending on your response to the screening questionnaire, you may be asked to participate in the study.

All mental health professionals and their patients eligible to take part in the study will be randomly allocated by a computer into either the treatment group or the control group.

If you are allocated to the control group, you will use the short ‘DIALOG scale’ on a tablet computer and if you are allocated to the treatment group you will use the ‘DIALOG+’ treatment/intervention on a tablet computer, together with your mental health professional. The treatment will last for 6 months. One of your sessions may be recorded. The session with your mental health professional can last between 20 minutes to 45 minutes.

A researcher will administer some questionnaires to you at the beginning, 3 months and at the end of 6 months.

In addition, if you used the DIALOG+, after the end of 6 months, you may be invited to a meeting with one of the researchers to share your experience of using the DIALOG+. This meeting will be recorded and the research assistant working for the team will transcribe the tape. When the tape is transcribed, you will not be identified by name but by a code number. The tape will be kept securely. We will analyse the transcript on secure computers. Any comments that we quote in our final report will be anonymised.

**Participation:**

Your participation in this study is purely voluntary. You can choose not to participate or to withdraw from this study at any point of time. Your decision not to participate in this project will not affect your access to the clinical services and other benefits that SCARF offers. These will continue as before or as usual.

If you are allocated to the DIALOG+ treatment group and you withdraw from the study, the research team will ask for your permission to attend an interview to complete the follow-up questionnaires to understand your experience of using the intervention, in order to capture your reasons for withdrawing. These are completely optional.

**Risks:**

We believe that this study is safe and do not expect you to suffer any harm or injury because of taking part. However, if you become distressed whilst taking part, we will stop the session and ask if you want to continue. You will receive support from the clinical services for your distress, if required. If you want to continue, we will give you time to recover before continuing.

**Benefits:**

You may like to try the new DIALOG+ treatment as it may help improve the communication between you and the mental health professional you see in regular clinical meetings, and we hope that this will help improve your quality of life.

**Confidentiality:**

Any information that we collect in this study will be kept confidential and safe by the study researchers. If you decide to take part in the study, a code number will be used to identify data about you, and we will keep the list that links codes to people’s identities locked separately from the data. All data will be stored in password-protected folders on a secure computer or in a locked cupboard and will only be accessible to the research team.

All interview recordings will be typed up on a computer and we will remove any identifying information from it. The audio recordings will be destroyed within two months of them being typed, and the typed information will be analysed. Quotes from the anonymised transcripts may be published in the final report and scientific publications.

**Cost:**

There are no costs associated with participating in this study.

**Compensation and reimbursement for participation in the study:**

You will be compensated 800 INR each for meetings with the researcher at the beginning, at 3 months, 6 months and if you are invited to meet with the researcher to discuss your experience of using DIALOG+

**Questions about the study:**

If you would like to ask any questions or receive more information about the study, then please contact

Dr. R. Padmavati, SCARF, Mental Health centre, R/7A, North Main Road, Anna Nagar, West Extension, Chennai -101; Tel: 044-26153971, E-mail: padmavati@scarfindia.org

Dr. Lakshmi Venkatraman/Ms.Hepsipa Omega Juliet, SCARF, Mental Health centre, R/7A, North Main Road, Anna Nagar, West Extension, Chennai- 600 101; Tel: 044-26153971, Email: [lakmesridhar@scarfindia.org/omega@scarfindia.org](about:blank)

Dr. Suvarna Jyothi, Sri Ramachandra Institute of Higher Education and Research (SRIHER) Porur, Chennai- 600116; Email: [suvarna@sriramachandra.edu.in](mailto:suvarna@sriramachandra.edu.in)

Prof. Vikas Menon, Jawaharlal Institute of Jawaharlal Institute of Postgraduate Medical Education and Research (JIPMER), Pondicherry - 605006, Email: [drvmenon@gmail.com](mailto:drvmenon@gmail.com)

Dr. Karthick Subramanian, Mahatma Gandhi Medical College and Research Institute (MGMCRI), Pondicherry - 607402, Email: [drkarthick.psy@gmail.com](mailto:drkarthick.psy@gmail.com)

If you have complaints regarding the conduct of the study please contact:

Dr. Suresh Kumar

Chairperson, IEC of SCARF,

SCARF, Mental Health Centre, R/7A, North Main Road, Anna Nagar, West Extension, Chennai - 600101. Tel: 044-24981939

**CONSENT TO PARTICIPATE IN RESEARCH STUDY**

........................................................................... has described to me what is going to be done, the risks, the benefits involved and my rights regarding this study. I understand that my decision to participate in this study will not alter my usual medical care or that of my family member. In the use of this information, my identity will be concealed. I am aware that I may withdraw at any time. I understand that by signing this form, I do not waive any of my legal rights but merely indicate that I have been informed about the research study in which I am voluntarily agreeing to participate. A copy of this form will be provided to me.

**Please tick the statements you agree with:**

I agree to participate in this study

I agree to my treatment session being audio recorded

I agree to participate in an interview with a researcher after 6 months

I agree to my discussion with a researcher about DIALOG+ to be audio recorded

Name ………………………

Signature/thumb print of participant …………………

Date ………………….

Name………………………

Signature of witness (if applicable)…………………

Date…………………...

Name ……………………….

Signature of interviewer ……………………

Date ………………….

## Appendix A: additional materials used for consent

## UCSD Brief Assessment of Capacity to Consent (UBACC)

This booklet is not complete until all questions are answered UCSD Brief Assessment of Capacity to Consent (UBACC) with Tamil Translation

|  | Trial 1  சோதனை 1 | Trial 2 சோதனை 2 | Trial 3  சோதனை 3 |
| --- | --- | --- | --- |
| **1. What is the purpose of the study that was just described to you?**  உங்களுக்கு இப்போது விவரிக்கப்பட்ட ஆய்வின் நோக்கம் என்ன? | | | |
| Response (2 = exploring the use of a new treatment using a tablet computer, improve communication between clinician and patient)  பதில்(2= டேப்லெட் கணினியைப் பயன்படுத்தி புதிய சிகிச்சையின் பயன்பாட்டை ஆராய்வது, மருத்துவர் மற்றும் நோயாளிக்கு இடையிலான தகவல்தொடர்புகளை மேம்படுத்துதல்) | Score  மதிப்பெண் | Score  மதிப்பெண் | Score  மதிப்பெண் |
| 0 | 0 | 0 |
| 1 | 1 | 1 |
| 2 | 2 | 2 |
|  |  |  |  |
| **2. What makes you want to consider participating in this study?**  எதனால் இந்த ஆய்வில் பங்கேற்க நினைக்கிறீர்கள்? | | | |
| Response (2 = enhance communication with my clinician, improve my outcomes)  பதில்(2= மருத்துவருடனான தொடர்புகளை மேம்படுத்துதல், எனது விளைவுகளை மேம்படுத்துதல்) | Score  மதிப்பெண் | Score  மதிப்பெண் | Score  மதிப்பெண் |
| 0 | 0 | 0 |
| 1 | 1 | 1 |
| 2 | 2 | 2 |
|  |  |  |  |
| **3. Do you believe this is primarily research or primarily treatment?**  இது ஆராய்ச்சி என்று நினைக்கிறீர்களா அல்லது சிகிச்சை என்று நினைக்கிறீர்களா? | | | |
| Response (2 = research study offering a treatment)  பதில்(2= ஒரு சிகிச்சை வழங்கும் ஆராய்ச்சி ஆய்வு) | Score  மதிப்பெண் | Score  மதிப்பெண் | Score  மதிப்பெண் |
| 0 | 0 | 0 |
| 1 | 1 | 1 |
| 2 | 2 | 2 |
|  |  |  |  |
|  |  |  |  |
| **4. Is it mandatory to participate in this study?**  இந்த ஆய்வில் பங்கேற்பது கட்டாயமா ? | | | |
| Response (2 = No)  பதில் (2= இல்லை) | Score  மதிப்பெண் | Score  மதிப்பெண் | Score  மதிப்பெண் |
| 0 | 0 | 0 |
| 1 | 1 | 1 |
| 2 | 2 | 2 |
|  |  |  |  |
| **5. If you withdraw from this study, will you still be able to receive regular treatment?**  இந்த ஆய்வில் இருந்து நீங்கள் விலகினாலும், நீங்கள்  இங்குபெறும் வழக்கமான சிகிச்சையை தொடர்ந்து பெற முடியுமா? | | | |
| Response (2 = Yes)  பதில் (2= ஆம்) | Score  மதிப்பெண் | Score  மதிப்பெண் | Score  மதிப்பெண் |
| 0 | 0 | 0 |
| 1 | 1 | 1 |
| 2 | 2 | 2 |
|  |  |  |  |
| **6. If you participate in this study, what are some of the things that you will be asked to do?**  இந்த ஆய்வில் நீங்கள் பங்கேற்றால், உங்களை செய்ய சொல்லும் விஷயங்கள் என்னென்ன?? | | | |
| Response (2 = At least 2 of the following: answer questions, I will use a tablet with my clinician in my session to rate my satisfaction, depending on the group I get allocated to, I will use a short scale at the end of the session or a longer scale with my clinician, I will take part in an interview after 6 months)  பதில் (2= பின்வருவனவற்றில் குறைந்தது 2, கேள்விகளுக்கு பதிலளிக்கவும், எனது திருப்தியை மதிப்பிடுவதற்கு எனது அமர்வில் எனது மருத்துவரிடம் ஒரு டேப்லெட்டைப் பயன்படுத்துவேன், நான் ஒதுக்கப்படும் குழுவைப் பொறுத்து, அமர்வின் முடிவில் ஒரு குறுகிய அளவை அல்லது எனது மருத்துவரிடம் நீண்ட அளவைப் பயன்படுத்துவேன், 6 மாதங்களுக்குப் பிறகு ஒரு நேர்காணலில் பங்கேற்பேன்) | Score  மதிப்பெண் | Score  மதிப்பெண் | Score  மதிப்பெண் |
| 0 | 0 | 0 |
| 1 | 1 | 1 |
| 2 | 2 | 2 |
|  |  |  |
|  |  |  |  |
|  | | | |
| 7. **Please describe some of the risks or discomforts that people may experience if they participate in this study. (Please describe the 2 serious risks associated with the study.)**  இந்த  ஆய்வில் பங்கேற்பதனால், பங்கேற்பாளர்கள் அனுபவிக்க கூடிய அசௌகரியங்கள் அல்லது தீங்குகளில் சிலவற்றை சொல்லுங்கள். (ஆய்வோடு தொடர்புடைய 2 கடுமையான அபாயங்களை விவரிக்கவும்.) | | | |
| Response (2 = no risk, I may get distressed during my session)  பதில்(2= ஆபத்து இல்லை, எனது அமர்வின் போது நான் மன உளைச்சலுக்கு ஆளாகலாம்) | Score  மதிப்பெண் | Score  மதிப்பெண் | Score  மதிப்பெண் |
| 0 | 0 | 0 |
| 1 | 1 | 1 |
| 2 | 2 | 2 |
|  |  |  |  |
| **8. Please describe some of the possible benefits of this study.**  இந்த ஆய்வில் ஏற்படக்கூடிய நன்மைகள் பற்றி சொல்லுங்கள். | | | |
| Response (2 = improve communication with my clinician, improve my quality of life)  பதில்(2= எனது மருத்துவருடன் தொடர்புகளை மேம்படுத்தவும், எனது வாழ்க்கைத் தரத்தை மேம்படுத்தவும்) | Score  மதிப்பெண் | Score  மதிப்பெண் | Score  மதிப்பெண் |
| 0 | 0 | 0 |
| 1 | 1 | 1 |
| 2 | 2 | 2 |
|  |  |  |  |
| **9. Is it possible that being in this study will not have any benefit to you?**  இந்த ஆய்வினால் உங்களுக்கு எந்த நன்மையும் இல்லாமலிருக்க வாய்ப்புள்ளதா? | | | |
| Response (2 = Yes)  பதில்(2= ஆம்) | Score  மதிப்பெண் | Score  மதிப்பெண் | Score  மதிப்பெண் |
| 0 | 0 | 0 |
| 1 | 1 | 1 |
| 2 | 2 | 2 |

| TOTAL SCORE: |  |  |
| --- | --- | --- |
